# Supplementary material
Source: HighWire-hosted journal article supplement (http://www.ajevonline.org/highwire/filestream/10021/field_highwire_adjunct_files/0/Supplemental_Data.pdf)
Supplement: Supplemental_Data.pdf [file Supplemental_Data.pdf]

**Supplemental Data for:**

Niimi J, Boss PK, Jeffery D and Bastian SEP. 2017.

Linking sensory properties and chemical composition of *Vitis vinifera* cv. Cabernet Sauvignon grape berries to wine.

Am J Enol Vitic 68:357-368. doi: 10.5344/ajev.2017.16115.

**Supplemental Table 1** Summary of harvest dates, berry sensory assessment (BSA) period, winemaking start dates, and wine sensory assessment periods for the 25 Cabernet Sauvignon samples from each of two vintages (2014 and 2015) across eight locations in South Australia.

| Sample <sup>a</sup> | 2014         |                                    |                       |                                     | 2015         |                                    |                       |                                     |
|---------------------|--------------|------------------------------------|-----------------------|-------------------------------------|--------------|------------------------------------|-----------------------|-------------------------------------|
|                     | Harvest date | BSA training and assessment period | Winemaking start date | Wine training and assessment period | Harvest date | BSA training and assessment period | Winemaking start date | Wine training and assessment period |
| BV1                 | 13 Mar       | 06 Feb to 17 Apr                   | 14 Mar                | 01 Oct to 14 Nov 14                 | 19 Feb       | 30 Jan to 30 Mar                   | 20 Feb                | 4 Apr 16 to 11 May 16               |
| BV2                 | 26 Mar       |                                    | 27 Mar                |                                     | 19 Feb       |                                    | 20 Feb                |                                     |
| CV1                 | 06 Mar       |                                    | 07 Mar                |                                     | 19 Feb       |                                    | 20 Feb                |                                     |
| CV2                 | 06 Mar       |                                    | 07 Mar                |                                     | 19 Feb       |                                    | 20 Feb                |                                     |
| CWA1                | 16 Apr       |                                    | 17 Apr                |                                     | –            |                                    | –                     |                                     |
| CWA2                | 16 Apr       |                                    | 17 Apr                |                                     | 20 Mar       |                                    | 21 Mar                |                                     |
| CWA3                | 09 Apr       |                                    | 10 Apr                |                                     | 26 Mar       |                                    | 27 Mar                |                                     |
| CWA5                | 16 Apr       |                                    | 17 Apr                |                                     | 20 Mar       |                                    | 21 Mar                |                                     |
| CWA6                | –            |                                    | –                     |                                     | 26 Mar       |                                    | 27 Mar                |                                     |
| EV1                 | 01 Apr       |                                    | 02 Apr                |                                     | 26 Feb       |                                    | 27 Feb                |                                     |
| EV2                 | 06 Apr       |                                    | 07 Apr                |                                     | 26 Feb       |                                    | 27 Feb                |                                     |
| LC1                 | 14 Mar       |                                    | 05 Mar                |                                     | 23 Feb       |                                    | 24 Feb                |                                     |
| LC2                 | 14 Mar       |                                    | 05 Mar                |                                     | 23 Feb       |                                    | 24 Feb                |                                     |
| McV1                | 12 Mar       |                                    | 13 Mar                |                                     | 20 Feb       |                                    | 21 Feb                |                                     |
| McV2                | 12 Mar       |                                    | 13 Mar                |                                     | 20 Feb       |                                    | 21 Feb                |                                     |
| RVL3                | 04 Mar       |                                    | 05 Mar                |                                     | 25 Feb       |                                    | 26 Feb                |                                     |
| RVL4                | 06 Feb       |                                    | 07 Feb                |                                     | 12 Feb       |                                    | 13 Feb                |                                     |
| RVL6                | 11 Mar       |                                    | 12 Mar                |                                     | 25 Feb       |                                    | 26 Feb                |                                     |
| RVL7                | 11 Mar       |                                    | 12 Mar                |                                     | 12 Feb       |                                    | 13 Feb                |                                     |
| RVL10               | 07 Mar       |                                    | 08 Mar                |                                     | 25 Feb       |                                    | 26 Feb                |                                     |
| RVL11               | 04 Mar       |                                    | 05 Mar                |                                     | 18 Feb       |                                    | 19 Feb                |                                     |
| RVL12               | 04 Mar       |                                    | 05 Mar                |                                     | 18 Feb       |                                    | 19 Feb                |                                     |
| RVL13               | 07 Mar       |                                    | 08 Mar                |                                     | 18 Feb       |                                    | 19 Feb                |                                     |
| RVL14               | 06 Feb       |                                    | 07 Feb                |                                     | 12 Feb       |                                    | 13 Feb                |                                     |
| WBY1                | 09 Apr       |                                    | 10 Apr                |                                     | 20 Mar       |                                    | 21 Mar                |                                     |
| WBY2                | 09 Apr       |                                    | 10 Apr                |                                     | 26 Mar       |                                    | 27 Mar                |                                     |

<sup>a</sup>BV1, BV2: Barossa Valley (two parcels); CV1, CV2: Clare Valley (two parcels); CWA1, CWA2, CWA3, CWA5, CWA6: Coonawarra (four parcels; in vintage 2015, CWA4 was replaced by CWA6 because the former was unavailable); EV1, EV2: Eden Valley (two parcels); McV1, McV2: McLaren Vale (two parcels); LC1, LC2: Langhorne Creek (two parcels); RVL3, RVL4, RVL6, RVL7, RVL10, RVL11, RVL12, RVL13, RVL14: Riverland (nine parcels); and WBY1, WBY2: Wrattonbully (two parcels).

**Supplemental Data for:**

Niimi J, Boss PK, Jeffery D and Bastian SEP. 2017.

Linking sensory properties and chemical composition of *Vitis vinifera* cv. Cabernet Sauvignon grape berries to wine.

Am J Enol Vitic 68:357-368. doi: 10.5344/ajev.2017.16115.

**Supplemental Table 2** Chemical and physical analyses of the 25 Cabernet Sauvignon grape samples from eight regions across South Australia showed significant differences ( $p < 0.001$ ) for all measured parameters.<sup>a</sup>

| Sample <sup>b</sup> | Ph_Color | Ph_Firmness | Ph_Pedicel removal | P_Juiciness | P_Detachability | P_Acidity | P_Red Confectionary | P_Dried Fruit | P_Tropical | SK_Vegetal green | SK_Disintegration |
|---------------------|----------|-------------|--------------------|-------------|-----------------|-----------|---------------------|---------------|------------|------------------|-------------------|
| BV1                 | 131.1    | 110.9       | 64.7               | 92.4        | 44.4            | 55.1      | 38.3                | 38.7          | 30.3       | 46.6             | 67.1              |
| BV2                 | 130.5    | 96.6        | 44.2               | 92.8        | 46.1            | 62.9      | 48.4                | 54.5          | 41.6       | 42.1             | 59.6              |
| CV1                 | 132.8    | 124.9       | 73.1               | 70.8        | 75.9            | 85.1      | 32.7                | 31.4          | 35.4       | 55.9             | 64.8              |
| CV2                 | 131.3    | 117.2       | 66.3               | 81.4        | 71.4            | 72.4      | 43.8                | 31.2          | 35.1       | 38.2             | 62.5              |
| CWA1                | 129.6    | 118.2       | 59.5               | 88.6        | 50.6            | 83.6      | 44.2                | 35.5          | 42.5       | 68.7             | 71.1              |
| CWA2                | 131.4    | 109.5       | 49.3               | 94.9        | 41.8            | 78.3      | 50.4                | 48.3          | 40.9       | 66.4             | 72.2              |
| CWA3                | 130.4    | 114.4       | 60.4               | 88.7        | 58.3            | 75.9      | 45.1                | 44.4          | 44.4       | 63.4             | 75.2              |
| CWA5                | 130.4    | 111.5       | 59.7               | 91.9        | 50.3            | 82.9      | 45.1                | 35.3          | 50.8       | 58.6             | 68.9              |
| EV1                 | 130.1    | 109.4       | 67.3               | 84.3        | 61.4            | 76.4      | 62.9                | 59.5          | 42.6       | 48.7             | 71.3              |
| EV2                 | 131.6    | 103.2       | 53.7               | 84.1        | 68.4            | 66.4      | 41.7                | 35.1          | 47.6       | 40.7             | 63.1              |
| LC1                 | 132.2    | 107.6       | 61.7               | 83.4        | 69.0            | 73.4      | 38.1                | 44.9          | 39.1       | 39.5             | 65.0              |
| LC2                 | 131.1    | 112.3       | 66.7               | 83.3        | 76.9            | 67.4      | 48.6                | 49.6          | 42.6       | 37.9             | 67.9              |
| McV1                | 124.5    | 89.1        | 58.1               | 83.5        | 74.1            | 69.9      | 36.7                | 41.1          | 33.6       | 36.1             | 61.1              |
| McV2                | 130.3    | 86.7        | 56.1               | 94.0        | 55.6            | 51.8      | 38.9                | 50.8          | 35.4       | 31.4             | 65.4              |
| RVL3                | 128.9    | 103.8       | 55.6               | 85.7        | 69.9            | 46.4      | 29.4                | 41.4          | 30.8       | 25.9             | 59.4              |
| RVL4                | 132.8    | 96.1        | 67.5               | 98.3        | 77.1            | 49.1      | 33.6                | 57.8          | 31.0       | 60.0             | 63.6              |
| RVL6                | 129.6    | 92.9        | 55.4               | 99.6        | 54.4            | 40.9      | 39.3                | 53.3          | 24.1       | 26.4             | 62.8              |
| RVL7                | 123.1    | 103.6       | 68.1               | 83.3        | 73.3            | 76.1      | 43.4                | 32.0          | 30.9       | 36.3             | 76.1              |
| RVL10               | 111.1    | 106.7       | 72.9               | 95.9        | 70.5            | 81.1      | 43.1                | 44.2          | 32.6       | 33.9             | 67.9              |
| RVL11               | 128.5    | 105.4       | 62.9               | 104.2       | 63.5            | 57.1      | 35.1                | 39.0          | 34.6       | 42.0             | 70.4              |
| RVL12               | 130.4    | 108.5       | 51.8               | 102.5       | 72.1            | 79.2      | 49.0                | 41.4          | 39.1       | 34.9             | 76.4              |
| RVL13               | 123.9    | 109.5       | 61.0               | 85.3        | 68.2            | 62.7      | 28.2                | 43.0          | 31.7       | 42.4             | 74.2              |
| RVL14               | 130.1    | 85.1        | 45.7               | 86.9        | 62.1            | 74.4      | 38.0                | 61.7          | 28.9       | 56.9             | 73.4              |
| WBY1                | 130.9    | 110.6       | 50.9               | 95.7        | 49.4            | 60.4      | 48.1                | 50.1          | 42.4       | 49.9             | 75.9              |
| WBY2                | 131.6    | 101.1       | 52.2               | 105.4       | 38.5            | 81.4      | 48.1                | 36.7          | 46.1       | 61.2             | 71.4              |
| P value             | <0.001   | <0.001      | 0.028              | 0.001       | 0.002           | <0.001    | 0.033               | 0.006         | 0.012      | <0.001           | 0.032             |

  

| Sample <sup>b</sup> | SD_Astringency crushed | SD_Bitterness | SD_Tannic intensity | Brix   | pH     | Titrateable acidity | Deformability | Color anthocyanins mg/g | Tannin | Total phenolics per g berry wt |
|---------------------|------------------------|---------------|---------------------|--------|--------|---------------------|---------------|-------------------------|--------|--------------------------------|
| BV1                 | 94.9                   | 74.9          | 90.0                | 22.9   | 3.84   | 6.08                | 1.1           | 1.57                    | 5.29   | 1.79                           |
| BV2                 | 102.9                  | 72.4          | 103.6               | 23.6   | 3.65   | 7.06                | 1.3           | 1.46                    | 6.08   | 1.91                           |
| CV1                 | 104.3                  | 94.1          | 104.9               | 23.8   | 3.69   | 6.01                | 1.3           | 1.94                    | 6.53   | 2.29                           |
| CV2                 | 106.9                  | 87.2          | 108.2               | 24.2   | 3.76   | 5.83                | 1.3           | 1.86                    | 6.48   | 2.07                           |
| CWA1                | 105.8                  | 60.4          | 105.7               | 24.2   | 3.46   | 6.30                | 1.1           | 2.05                    | 6.12   | 1.96                           |
| CWA2                | 101.8                  | 71.5          | 103.9               | 23.9   | 3.59   | 6.55                | 1.2           | 2.20                    | 4.53   | 1.97                           |
| CWA3                | 100.7                  | 88.0          | 103.9               | 23.6   | 3.64   | 6.17                | 1.1           | 1.96                    | 4.84   | 1.77                           |
| CWA5                | 94.5                   | 58.1          | 101.1               | 22.8   | 3.48   | 6.99                | 1.1           | 1.69                    | 4.71   | 1.74                           |
| EV1                 | 99.9                   | 61.1          | 95.6                | 25.1   | 3.73   | 6.74                | 1.1           | 1.65                    | 5.62   | 1.89                           |
| EV2                 | 94.1                   | 63.0          | 97.1                | 24.7   | 3.72   | 6.37                | 1.2           | 1.40                    | 4.29   | 1.49                           |
| LC1                 | 92.0                   | 72.1          | 94.4                | 23.5   | 3.73   | 6.27                | 1.3           | 1.87                    | 4.85   | 1.75                           |
| LC2                 | 103.5                  | 76.1          | 99.1                | 23.7   | 3.74   | 6.27                | 1.4           | 1.54                    | 4.29   | 1.58                           |
| McV1                | 94.3                   | 82.4          | 93.2                | 24.6   | 3.87   | 6.21                | 1.5           | 1.69                    | 5.08   | 1.81                           |
| McV2                | 88.4                   | 58.2          | 87.6                | 25.2   | 3.71   | 6.33                | 1.2           | 1.90                    | 4.73   | 1.89                           |
| RVL3                | 71.9                   | 40.7          | 79.3                | 22.3   | 3.95   | 5.20                | 1.5           | 1.04                    | 4.01   | 1.33                           |
| RVL4                | 90.2                   | 79.4          | 94.7                | 23.8   | 3.78   | 5.66                | 1.7           | 1.16                    | 4.85   | 1.36                           |
| RVL6                | 87.6                   | 57.8          | 94.2                | 23.9   | 3.86   | 5.79                | 1.4           | 0.96                    | 4.50   | 1.37                           |
| RVL7                | 88.1                   | 53.4          | 95.1                | 23.5   | 3.77   | 6.02                | 1.2           | 1.23                    | 4.79   | 1.45                           |
| RVL10               | 96.6                   | 73.9          | 94.5                | 23.0   | 3.62   | 7.11                | 1.2           | 1.11                    | 3.76   | 1.45                           |
| RVL11               | 75.9                   | 41.4          | 80.2                | 22.8   | 3.88   | 5.24                | 1.2           | 1.25                    | 3.95   | 1.57                           |
| RVL12               | 95.2                   | 72.1          | 92.0                | 24.3   | 3.78   | 6.38                | 1.2           | 1.21                    | 3.85   | 1.50                           |
| RVL13               | 88.3                   | 50.3          | 84.3                | 23.3   | 3.79   | 6.38                | 1.3           | 1.14                    | 3.93   | 1.63                           |
| RVL14               | 98.5                   | 87.6          | 100.4               | 24.8   | 3.71   | 6.20                | 1.8           | 0.88                    | 4.57   | 1.32                           |
| WBY1                | 100.9                  | 80.1          | 100.7               | 25.2   | 3.94   | 4.91                | 1.1           | 2.06                    | 4.63   | 1.67                           |
| WBY2                | 98.2                   | 73.7          | 100.3               | 25.3   | 3.72   | 6.26                | 1.2           | 2.11                    | 4.94   | 1.81                           |
| P value             | 0.004                  | <0.001        | 0.018               | <0.001 | <0.001 | <0.001              | <0.001        | <0.001                  | <0.001 | <0.001                         |

<sup>a</sup>P: pulp; Ph: physical; SD: seeds; SK: skins.

<sup>b</sup>BV1, BV2: Barossa Valley (two parcels); CV1, CV2: Clare Valley (two parcels); CWA1, CWA2, CWA3, CWA5, CWA6: Coonawarra (four parcels; in vintage 2015, CWA4 was replaced by CWA6 because the former was unavailable); EV1, EV2: Eden Valley (two parcels); McV1, McV2: McLaren Vale (two parcels); LC1, LC2: Langhorne Creek (two parcels); RVL3, RVL4, RVL6, RVL7, RVL10, RVL11, RVL12, RVL13, RVL14: Riverland (nine parcels); and WBY1, WBY2: Wrattonbully (two parcels).

**Supplemental Data for:**

Niimi J, Boss PK, Jeffery D and Bastian SEP. 2017.

Linking sensory properties and chemical composition of *Vitis vinifera* cv. Cabernet Sauvignon grape berries to wine.

Am J Enol Vitic 68:357-368. doi: 10.5344/ajev.2017.16115.

**Supplemental Table 3** Chemical and physical variables of the 25 Cabernet Sauvignon grape samples from eight regions across South Australia analyzed with one-way ANOVA were significantly different ( $p < 0.001$ ) across samples for all measurements.<sup>a</sup>

| Sample <sup>b</sup> | Ph_Color | Ph_Firmness | Ph_Pedice<br>removal | P_Juiciness | P_Gelatinous | P_Sweet | P_Acidity | P_Jam | P_Dark<br>Berry | P_Dried<br>Fruit | P_Green |
|---------------------|----------|-------------|----------------------|-------------|--------------|---------|-----------|-------|-----------------|------------------|---------|
| BV1                 | 130.3    | 85.9        | 48.1                 | 88.0        | 52.1         | 83.0    | 64.5      | 28.3  | 75.5            | 32.1             | 54.1    |
| BV2                 | 131.8    | 69.3        | 46.3                 | 88.8        | 54.9         | 83.7    | 68.5      | 37.5  | 78.2            | 35.4             | 38.7    |
| CV1                 | 132.8    | 65.3        | 34.1                 | 77.3        | 42.3         | 97.4    | 53.8      | 45.6  | 77.5            | 46.3             | 21.3    |
| CV2                 | 130.2    | 55.5        | 41.9                 | 69.0        | 48.7         | 100.4   | 45.4      | 58.9  | 71.1            | 61.8             | 27.0    |
| CWA2                | 131.6    | 114.3       | 39.2                 | 102.7       | 51.4         | 87.1    | 73.8      | 39.0  | 80.2            | 36.0             | 33.1    |
| CWA3                | 132.2    | 103.7       | 43.1                 | 82.7        | 58.1         | 93.6    | 63.6      | 41.9  | 74.1            | 25.4             | 26.6    |
| CWA5                | 130.1    | 114.6       | 56.4                 | 90.8        | 51.6         | 72.1    | 69.8      | 32.2  | 77.8            | 27.0             | 33.3    |
| CWA6                | 133.8    | 108.2       | 39.4                 | 87.0        | 56.4         | 91.3    | 64.8      | 38.3  | 76.4            | 25.7             | 37.1    |
| EV1                 | 132.5    | 81.1        | 52.9                 | 80.9        | 62.1         | 85.5    | 63.8      | 32.9  | 80.6            | 24.0             | 39.1    |
| EV2                 | 132.4    | 103.8       | 50.9                 | 88.0        | 58.1         | 78.6    | 68.2      | 22.3  | 73.5            | 24.0             | 64.6    |
| LC1                 | 132.0    | 65.8        | 37.6                 | 67.7        | 57.1         | 96.9    | 44.5      | 43.4  | 85.6            | 41.7             | 20.4    |
| LC2                 | 132.5    | 92.7        | 36.5                 | 73.7        | 56.6         | 89.4    | 54.6      | 27.7  | 82.9            | 26.5             | 28.2    |
| McV1                | 133.0    | 45.0        | 38.1                 | 61.8        | 58.7         | 100.7   | 48.1      | 49.2  | 90.9            | 49.9             | 18.1    |
| McV2                | 132.6    | 66.5        | 43.0                 | 72.0        | 68.7         | 100.7   | 50.5      | 48.2  | 88.9            | 44.6             | 19.7    |
| RVL3                | 132.9    | 115.4       | 54.5                 | 90.2        | 49.9         | 103.1   | 44.8      | 29.4  | 89.0            | 23.5             | 20.4    |
| RVL4                | 131.0    | 107.7       | 35.9                 | 80.4        | 47.4         | 89.2    | 50.0      | 34.6  | 77.9            | 36.9             | 26.0    |
| RVL6                | 126.9    | 121.9       | 55.5                 | 92.4        | 46.0         | 97.0    | 38.5      | 29.1  | 82.6            | 21.8             | 21.0    |
| RVL7                | 132.3    | 116.4       | 46.5                 | 73.4        | 39.6         | 84.9    | 40.4      | 40.8  | 71.9            | 36.7             | 26.2    |
| RVL10               | 115.2    | 117.7       | 62.4                 | 87.5        | 54.8         | 86.9    | 58.4      | 28.8  | 82.2            | 16.4             | 24.6    |
| RVL11               | 123.6    | 127.0       | 68.7                 | 77.0        | 44.6         | 77.3    | 58.8      | 26.0  | 72.8            | 25.4             | 34.1    |
| RVL12               | 127.1    | 102.9       | 50.4                 | 94.7        | 42.6         | 96.2    | 56.7      | 33.1  | 84.8            | 35.4             | 42.4    |
| RVL13               | 128.1    | 99.8        | 57.5                 | 71.0        | 52.6         | 100.7   | 47.3      | 48.2  | 82.1            | 42.4             | 22.9    |
| RVL14               | 132.7    | 96.5        | 44.7                 | 80.5        | 48.0         | 89.7    | 46.6      | 42.6  | 75.3            | 41.1             | 21.2    |
| WBY1                | 133.0    | 103.5       | 54.7                 | 91.3        | 51.2         | 96.7    | 49.9      | 46.0  | 85.3            | 31.4             | 17.1    |
| WBY2                | 133.6    | 112.4       | 39.7                 | 86.9        | 59.9         | 93.1    | 57.2      | 36.3  | 81.6            | 26.2             | 23.9    |
| P value             | <0.001   | <0.001      | <0.001               | <0.001      | 0.042        | 0.001   | <0.001    | 0.011 | 0.019           | <0.001           | <0.001  |

| Sample <sup>b</sup> | SK_Acidity | SK_Dark<br>Berry | SK_Dried<br>Fruit | SK_Vegetal<br>green | SK_Thickness | SK_Bitter | SK_Astringency | SK_Disintegra-<br>tion | SK_Tannic | SK_Resalivation | SD_Color |
|---------------------|------------|------------------|-------------------|---------------------|--------------|-----------|----------------|------------------------|-----------|-----------------|----------|
| BV1                 | 44.2       | 68.8             | 33.0              | 66.2                | 75.9         | 34.1      | 76.3           | 52.8                   | 72.1      | 78.9            | 63.8     |
| BV2                 | 44.6       | 64.8             | 36.3              | 66.4                | 78.6         | 41.0      | 69.7           | 50.3                   | 74.0      | 81.9            | 63.1     |
| CV1                 | 34.1       | 74.0             | 48.1              | 33.6                | 58.0         | 27.7      | 56.4           | 43.2                   | 61.3      | 66.0            | 70.3     |
| CV2                 | 40.3       | 71.2             | 65.7              | 41.3                | 69.3         | 31.1      | 79.1           | 44.0                   | 68.3      | 83.1            | 75.8     |
| CWA2                | 42.7       | 51.4             | 24.2              | 61.8                | 97.3         | 54.7      | 77.0           | 62.9                   | 68.9      | 91.8            | 81.5     |
| CWA3                | 30.9       | 63.5             | 26.4              | 40.1                | 76.0         | 54.9      | 78.6           | 62.3                   | 68.4      | 81.3            | 90.5     |
| CWA5                | 36.5       | 57.9             | 33.3              | 42.1                | 79.7         | 42.6      | 64.8           | 56.8                   | 63.0      | 77.2            | 77.9     |
| CWA6                | 37.8       | 59.9             | 21.6              | 49.1                | 81.2         | 44.3      | 73.0           | 62.1                   | 68.9      | 80.7            | 90.6     |
| EV1                 | 48.9       | 61.0             | 31.8              | 55.7                | 75.5         | 44.2      | 83.1           | 55.6                   | 81.0      | 85.1            | 78.6     |
| EV2                 | 40.7       | 48.5             | 20.1              | 78.3                | 83.3         | 36.4      | 76.4           | 59.6                   | 72.2      | 80.6            | 64.9     |
| LC1                 | 29.8       | 73.5             | 39.6              | 42.7                | 64.3         | 27.7      | 64.2           | 45.9                   | 62.6      | 71.5            | 79.9     |
| LC2                 | 32.0       | 60.6             | 27.6              | 48.1                | 62.3         | 33.6      | 71.9           | 49.1                   | 71.2      | 81.8            | 72.1     |
| McV1                | 33.6       | 81.1             | 52.7              | 40.1                | 58.0         | 29.2      | 61.3           | 40.5                   | 61.3      | 61.1            | 76.8     |
| McV2                | 31.5       | 65.0             | 46.9              | 42.0                | 64.1         | 30.4      | 66.3           | 49.3                   | 66.1      | 66.6            | 82.4     |
| RVL3                | 26.0       | 69.1             | 24.8              | 27.3                | 70.2         | 34.7      | 75.4           | 53.0                   | 69.9      | 81.1            | 104.1    |
| RVL4                | 37.2       | 70.5             | 37.3              | 39.8                | 75.5         | 33.5      | 68.1           | 57.5                   | 77.0      | 87.7            | 63.9     |
| RVL6                | 25.2       | 68.1             | 27.5              | 26.0                | 60.1         | 28.7      | 56.8           | 51.0                   | 61.6      | 73.1            | 96.0     |
| RVL7                | 31.9       | 68.5             | 40.7              | 40.5                | 68.0         | 25.1      | 55.1           | 48.0                   | 72.9      | 76.6            | 77.5     |
| RVL10               | 42.5       | 56.2             | 18.8              | 39.9                | 65.4         | 32.7      | 75.6           | 51.5                   | 71.9      | 76.8            | 87.3     |
| RVL11               | 31.7       | 66.0             | 32.3              | 37.5                | 64.2         | 30.7      | 63.2           | 57.7                   | 64.1      | 71.8            | 76.9     |
| RVL12               | 39.5       | 60.5             | 34.3              | 50.7                | 76.5         | 37.3      | 78.1           | 52.2                   | 79.1      | 90.3            | 75.4     |
| RVL13               | 36.5       | 73.6             | 60.2              | 30.4                | 65.7         | 29.1      | 73.9           | 50.2                   | 75.9      | 83.8            | 85.6     |
| RVL14               | 36.2       | 70.1             | 46.4              | 44.5                | 75.3         | 32.1      | 60.2           | 49.1                   | 74.9      | 76.6            | 67.9     |
| WBY1                | 33.3       | 69.2             | 33.0              | 44.6                | 67.9         | 38.6      | 61.9           | 53.0                   | 54.7      | 75.8            | 93.5     |
| WBY2                | 28.2       | 69.5             | 29.3              | 32.4                | 64.8         | 45.9      | 67.0           | 56.4                   | 60.8      | 75.9            | 88.6     |
| P value             | 0.021      | 0.005            | <0.001            | <0.001              | <0.001       | <0.001    | <0.001         | 0.009                  | 0.013     | 0.01            | <0.001   |

| Sample <sup>b</sup> | SD_Herb<br>Green | SD_Tannic | Brix   | pH     | TA     | Deformability | Anthocyanins | Total phenolics | Total tannin |
|---------------------|------------------|-----------|--------|--------|--------|---------------|--------------|-----------------|--------------|
| BV1                 | 24.2             | 79.9      | 24.87  | 3.66   | 5.48   | 2             | 1.42         | 1.48            | 5.95         |
| BV2                 | 22.8             | 84.0      | 25.38  | 3.66   | 6.37   | 2.75          | 1.41         | 1.44            | 5.45         |
| CV1                 | 24.6             | 77.8      | 26.65  | 3.63   | 4.67   | 2.22          | 1.52         | 1.7             | 7.33         |
| CV2                 | 27.4             | 82.2      | 25.94  | 3.58   | 5.51   | 2.13          | 1.65         | 1.69            | 7.41         |
| CWA2                | 31.7             | 59.2      | 24.05  | 3.67   | 5.47   | 1.53          | 1.74         | 1.35            | 4.84         |
| CWA3                | 31.5             | 73.2      | 25.23  | 3.42   | 5.53   | 1.9           | 1.64         | 1.48            | 5.18         |
| CWA5                | 39.3             | 73.4      | 23.76  | 3.42   | 6.72   | 1.16          | 1.35         | 1.35            | 5.87         |
| CWA6                | 41.5             | 63.8      | 24.81  | 3.39   | 6.94   | 1.6           | 1.53         | 1.22            | 4.24         |
| EV1                 | 25.8             | 72.6      | 23.9   | 3.69   | 5.4    | 1.89          | 1.22         | 1.41            | 5.41         |
| EV2                 | 33.1             | 73.8      | 22.58  | 3.58   | 6.97   | 1.54          | 1.16         | 1.21            | 5.05         |
| LC1                 | 22.9             | 71.7      | 25.13  | 3.8    | 5.01   | 2.05          | 1.55         | 1.41            | 4.91         |
| LC2                 | 29.6             | 76.2      | 23.41  | 3.71   | 5.24   | 1.92          | 1.4          | 1.3             | 5.42         |
| McV1                | 28.9             | 74.7      | 25.55  | 3.71   | 4.12   | 2.35          | 1.89         | 1.6             | 6.09         |
| McV2                | 23.7             | 81.3      | 26.48  | 3.49   | 4.51   | 2.34          | 1.76         | 1.63            | 6.47         |
| RVL3                | 26.9             | 74.7      | 24.14  | 3.84   | 5.86   | 1.49          | 0.98         | 1.31            | 5.21         |
| RVL4                | 29.6             | 89.0      | 25.65  | 3.67   | 4.85   | 1.35          | 1.3          | 1.5             | 6.02         |
| RVL6                | 18.9             | 69.2      | 24.2   | 3.72   | 6.02   | 1.47          | 0.79         | 1.09            | 5.32         |
| RVL7                | 19.7             | 86.9      | 26.49  | 3.66   | 4.6    | 1.58          | 1.35         | 1.76            | 7.57         |
| RVL10               | 23.9             | 74.3      | 23.36  | 3.58   | 5.56   | 1.48          | 0.72         | 1.16            | 4.81         |
| RVL11               | 22.2             | 74.9      | 22.58  | 3.55   | 5.15   | 1.32          | 0.9          | 1.24            | 4.91         |
| RVL12               | 28.3             | 82.1      | 24.16  | 3.6    | 6.03   | 1.89          | 1.08         | 1.27            | 5            |
| RVL13               | 20.8             | 74.7      | 26.65  | 3.68   | 4.96   | 1.82          | 1.06         | 1.41            | 6.3          |
| RVL14               | 18.2             | 75.6      | 26.35  | 3.75   | 5.45   | 1.83          | 1.1          | 1.29            | 5.22         |
| WBY1                | 27.3             | 59.4      | 25.58  | 3.88   | 4.25   | 1.56          | 1.84         | 1.53            | 5.7          |
| WBY2                | 33.7             | 65.8      | 24.14  | 3.47   | 6.42   | 1.42          | 1.47         | 1.27            | 4.77         |
| P value             | 0.023            | 0.025     | <0.001 | <0.001 | <0.001 | <0.001        | <0.001       | <0.001          | <0.001       |

<sup>a</sup>P: pulp; Ph: physical; SD: seeds; SK: skins.

<sup>b</sup>BV1, BV2: Barossa Valley (two parcels); CV1, CV2: Clare Valley (two parcels); CWA1, CWA2, CWA3, CWA5, CWA6: Coonawarra (four parcels; in vintage 2015, CWA4 was replaced by CWA6 because the former was unavailable); EV1, EV2: Eden Valley (two parcels); McV1, McV2: McLaren Vale (two parcels); LC1, LC2: Langhorne Creek (two parcels); RVL3, RVL4, RVL6, RVL7, RVL10, RVL11, RVL12, RVL13, RVL14: Riverland (nine parcels); and WBY1, WBY2: Wrattontully (two parcels).

**Supplemental Data for:**

Niimi J, Boss PK, Jeffery D and Bastian SEP. 2017.

Linking sensory properties and chemical composition of *Vitis vinifera* cv. Cabernet Sauvignon grape berries to wine.

Am J Enol Vitic 68:357-368. doi: 10.5344/ajev.2017.16115.

**Supplemental Table 4** Chemical variables of the 25 Cabernet Sauvignon grape samples from eight regions across South Australia were analyzed with one-way ANOVA and were significantly different ( $p < 0.001$ , except for TA [ $p < 0.01$ ]) across samples for all measurements.<sup>a</sup>

| Sample <sup>b</sup> | Hue    | Depth of color | Overall aroma | Dark fruit_A | Red fruit_A | Jam_A  | Confec-tionary_A | Pepper_A | Spice_A | Alcohol_A | Green_A |
|---------------------|--------|----------------|---------------|--------------|-------------|--------|------------------|----------|---------|-----------|---------|
| BV1                 | 10.95  | 10.53          | 9.99          | 9.44         | 6.96        | 7.55   | 5.67             | 6.24     | 6.17    | 7.24      | 6.62    |
| BV2                 | 5.35   | 5.94           | 9.22          | 7.14         | 7.74        | 5.52   | 4.33             | 6.18     | 6.39    | 6.48      | 7.04    |
| CV1                 | 11.85  | 10.64          | 9.52          | 8.26         | 6.89        | 5.71   | 4.77             | 5.59     | 5.94    | 7.51      | 6.87    |
| CV2                 | 12.33  | 11.16          | 10.11         | 9.92         | 6.08        | 7.31   | 5.71             | 6.45     | 6.17    | 7.50      | 6.30    |
| CWA1                | 10.10  | 9.30           | 9.04          | 8.53         | 6.57        | 6.26   | 5.13             | 5.87     | 5.67    | 5.95      | 6.41    |
| CWA2                | 12.08  | 10.76          | 9.79          | 9.50         | 7.51        | 7.22   | 5.62             | 5.97     | 5.84    | 7.07      | 6.53    |
| CWA3                | 11.08  | 10.09          | 9.93          | 8.71         | 6.56        | 6.03   | 4.93             | 6.09     | 5.94    | 6.80      | 7.50    |
| CWA5                | 9.86   | 6.08           | 8.67          | 5.06         | 5.36        | 4.26   | 3.85             | 4.35     | 4.62    | 5.03      | 3.90    |
| EV1                 | 10.94  | 10.89          | 9.81          | 9.06         | 6.45        | 5.96   | 4.47             | 6.08     | 5.83    | 7.94      | 7.04    |
| EV2                 | 9.90   | 8.26           | 9.57          | 8.27         | 6.73        | 5.32   | 4.61             | 5.70     | 6.17    | 6.59      | 8.10    |
| LC1                 | 11.10  | 9.19           | 9.63          | 8.68         | 7.28        | 6.31   | 5.97             | 5.48     | 5.92    | 7.06      | 6.87    |
| LC2                 | 10.43  | 9.31           | 9.93          | 8.76         | 7.10        | 6.38   | 5.97             | 6.69     | 6.66    | 6.61      | 6.80    |
| MCV1                | 7.72   | 9.57           | 10.17         | 8.74         | 6.62        | 7.71   | 4.58             | 7.51     | 6.85    | 6.90      | 5.78    |
| MCV2                | 9.85   | 8.78           | 9.78          | 9.35         | 6.84        | 6.70   | 5.21             | 6.26     | 6.64    | 7.61      | 6.16    |
| RVL3                | 3.17   | 2.36           | 9.37          | 6.64         | 8.68        | 6.08   | 5.88             | 5.17     | 5.03    | 6.34      | 5.87    |
| RVL4                | 6.80   | 8.04           | 8.92          | 7.38         | 7.09        | 5.99   | 5.41             | 4.92     | 4.98    | 7.47      | 5.75    |
| RVL6                | 5.58   | 4.01           | 9.15          | 6.75         | 7.88        | 5.22   | 6.22             | 5.41     | 5.21    | 6.39      | 6.19    |
| RVL7                | 3.52   | 3.91           | 8.99          | 6.99         | 8.72        | 6.24   | 5.81             | 5.87     | 5.82    | 7.63      | 5.29    |
| RVL10               | 1.73   | 1.35           | 8.33          | 5.11         | 8.48        | 3.97   | 5.28             | 4.70     | 4.94    | 6.60      | 6.60    |
| RVL11               | 5.14   | 2.74           | 8.23          | 6.55         | 6.87        | 5.02   | 5.29             | 5.23     | 4.92    | 6.54      | 5.76    |
| RVL12               | 2.30   | 3.72           | 8.50          | 5.95         | 7.76        | 5.41   | 4.72             | 5.19     | 5.34    | 7.04      | 6.17    |
| RVL13               | 4.88   | 2.12           | 8.39          | 5.66         | 7.49        | 4.52   | 5.77             | 4.45     | 5.18    | 6.60      | 5.81    |
| RVL14               | 3.96   | 3.39           | 8.23          | 5.68         | 7.60        | 4.49   | 6.55             | 5.09     | 5.49    | 6.95      | 5.78    |
| WBY1                | 12.21  | 11.27          | 10.40         | 9.56         | 6.09        | 6.23   | 4.38             | 6.72     | 6.39    | 7.83      | 8.15    |
| WBY2                | 9.97   | 10.29          | 10.21         | 9.66         | 6.88        | 6.88   | 5.54             | 5.39     | 5.74    | 6.94      | 6.43    |
| <i>P</i> value      | <0.001 | <0.001         | <0.001        | <0.001       | 0.001       | <0.001 | 0.018            | <0.001   | 0.002   | 0.008     | 0.001   |

  

| Sample <sup>b</sup> | Tobacco/leather_A | Rubber_A | Earthy_A | Overall flavor | Dark fruit_F | Red fruit_F | Jam_F  | Confec-tionary_F | Pepper_F | Spice_F | Savory_F |
|---------------------|-------------------|----------|----------|----------------|--------------|-------------|--------|------------------|----------|---------|----------|
| BV1                 | 4.78              | 1.50     | 2.07     | 10.44          | 9.51         | 8.01        | 7.13   | 5.24             | 7.06     | 6.04    | 3.75     |
| BV2                 | 4.73              | 2.15     | 2.71     | 9.81           | 8.29         | 8.36        | 6.38   | 4.79             | 6.72     | 6.14    | 4.24     |
| CV1                 | 4.22              | 2.37     | 2.49     | 9.68           | 8.92         | 7.66        | 6.09   | 4.52             | 6.77     | 5.64    | 3.71     |
| CV2                 | 4.58              | 1.53     | 2.43     | 10.53          | 10.41        | 6.90        | 6.96   | 5.17             | 6.80     | 5.90    | 4.31     |
| CWA1                | 5.16              | 2.54     | 2.95     | 9.49           | 9.31         | 7.21        | 6.07   | 4.32             | 6.20     | 5.88    | 4.42     |
| CWA2                | 4.24              | 1.54     | 1.99     | 9.75           | 9.72         | 7.38        | 6.38   | 4.68             | 6.47     | 5.63    | 2.88     |
| CWA3                | 4.08              | 1.51     | 2.15     | 9.30           | 9.26         | 7.27        | 5.77   | 4.30             | 7.13     | 5.99    | 3.72     |
| CWA5                | 6.27              | 6.83     | 3.76     | 9.01           | 5.64         | 6.54        | 4.64   | 3.25             | 4.83     | 4.22    | 4.06     |
| EV1                 | 5.24              | 2.47     | 2.93     | 10.33          | 9.92         | 7.55        | 7.37   | 5.18             | 7.39     | 6.33    | 4.41     |
| EV2                 | 5.05              | 2.33     | 2.53     | 9.69           | 9.44         | 7.31        | 6.52   | 5.18             | 7.12     | 5.88    | 3.85     |
| LC1                 | 4.38              | 2.46     | 2.08     | 9.42           | 9.43         | 6.98        | 6.33   | 4.74             | 6.48     | 5.59    | 3.57     |
| LC2                 | 4.09              | 1.65     | 2.54     | 10.16          | 9.92         | 7.36        | 6.55   | 4.74             | 6.79     | 6.39    | 3.92     |
| MCV1                | 6.11              | 2.31     | 2.46     | 10.63          | 9.95         | 6.42        | 8.60   | 4.76             | 8.15     | 6.72    | 5.27     |
| MCV2                | 4.57              | 1.47     | 2.08     | 10.40          | 9.52         | 8.01        | 7.07   | 5.12             | 7.47     | 6.57    | 4.18     |
| RVL3                | 4.54              | 1.92     | 2.34     | 9.60           | 7.02         | 9.07        | 5.76   | 5.72             | 5.56     | 5.51    | 3.50     |
| RVL4                | 4.10              | 1.46     | 1.98     | 8.98           | 8.30         | 7.54        | 7.07   | 4.86             | 6.47     | 5.29    | 3.96     |
| RVL6                | 4.04              | 2.21     | 2.01     | 9.04           | 7.48         | 8.55        | 5.89   | 5.92             | 5.90     | 5.17    | 3.69     |
| RVL7                | 4.22              | 1.85     | 2.68     | 9.14           | 7.68         | 8.46        | 6.39   | 5.04             | 7.12     | 6.34    | 3.73     |
| RVL10               | 3.90              | 2.48     | 2.37     | 8.38           | 5.65         | 8.83        | 5.07   | 5.24             | 5.67     | 5.31    | 3.75     |
| RVL11               | 4.07              | 1.64     | 2.48     | 8.83           | 7.17         | 7.89        | 5.09   | 4.76             | 5.94     | 5.29    | 3.61     |
| RVL12               | 4.71              | 2.72     | 2.63     | 9.17           | 7.12         | 7.88        | 5.86   | 5.17             | 6.52     | 5.57    | 4.40     |
| RVL13               | 4.19              | 1.59     | 2.35     | 8.82           | 5.99         | 8.05        | 4.62   | 5.31             | 5.13     | 5.02    | 3.90     |
| RVL14               | 3.75              | 2.43     | 2.35     | 8.88           | 6.50         | 7.47        | 4.98   | 4.90             | 7.19     | 5.33    | 3.50     |
| WBY1                | 5.23              | 1.95     | 2.93     | 10.03          | 10.20        | 6.95        | 7.01   | 4.40             | 7.44     | 6.86    | 4.24     |
| WBY2                | 4.60              | 1.96     | 2.51     | 10.09          | 10.06        | 6.93        | 7.36   | 4.94             | 6.42     | 6.12    | 4.34     |
| <i>P</i> value      | 0.022             | <0.001   | 0.024    | <0.001         | <0.001       | 0.007       | <0.001 | 0.028            | <0.001   | <0.001  | 0.032    |

**Supplemental Data for:**

Niimi J, Boss PK, Jeffery D and Bastian SEP. 2017.

Linking sensory properties and chemical composition of *Vitis vinifera* cv. Cabernet Sauvignon grape berries to wine.

Am J Enol Vitic 68:357-368. doi: 10.5344/ajev.2017.16115.

**Supplemental Table 4 (continued)** Chemical variables of the 25 Cabernet Sauvignon grape samples from eight regions across South Australia were analyzed with one-way ANOVA and were significantly different ( $p < 0.001$ , except for TA [ $p < 0.01$ ]) across samples for all measurements.<sup>a</sup>

| Sample <sup>b</sup> | Green_F | Rubber_F | Acid_T | Fruit sweetness_T | Bitter_T | Body_MF | Astringency_MF | Alcohol intensity_MF | Length_AT | pH     | Titrateable acidity (g/L) |
|---------------------|---------|----------|--------|-------------------|----------|---------|----------------|----------------------|-----------|--------|---------------------------|
| BV1                 | 7.37    | 1.49     | 9.00   | 5.88              | 4.44     | 8.98    | 8.11           | 8.44                 | 12.03     | 3.26   | 9.29                      |
| BV2                 | 6.77    | 1.74     | 8.46   | 5.90              | 4.88     | 7.24    | 7.60           | 8.31                 | 10.87     | 3.37   | 8.34                      |
| CV1                 | 7.69    | 2.00     | 8.29   | 5.35              | 5.24     | 8.37    | 8.14           | 8.38                 | 10.81     | 3.31   | 7.55                      |
| CV2                 | 8.10    | 1.45     | 7.83   | 4.92              | 5.26     | 9.46    | 8.63           | 8.33                 | 11.37     | 3.36   | 8.72                      |
| CWA1                | 7.91    | 2.01     | 7.96   | 4.79              | 5.28     | 8.15    | 9.00           | 8.63                 | 10.03     | 3.56   | 7.09                      |
| CWA2                | 7.74    | 1.65     | 8.56   | 4.80              | 5.02     | 9.37    | 8.65           | 8.70                 | 10.94     | 3.44   | 8.21                      |
| CWA3                | 8.38    | 1.39     | 9.69   | 4.47              | 4.46     | 7.87    | 8.85           | 8.70                 | 10.67     | 3.42   | 8.82                      |
| CWA5                | 5.60    | 7.66     | 8.12   | 3.95              | 4.51     | 6.11    | 6.79           | 6.57                 | 9.15      | 3.38   | 7.84                      |
| EV1                 | 7.21    | 2.09     | 8.72   | 6.49              | 4.49     | 9.23    | 8.01           | 8.92                 | 11.51     | 3.38   | 8.29                      |
| EV2                 | 7.98    | 1.41     | 8.73   | 5.59              | 5.23     | 8.70    | 8.05           | 8.91                 | 11.07     | 3.41   | 7.87                      |
| LC1                 | 8.16    | 1.74     | 8.68   | 4.93              | 5.32     | 8.12    | 7.61           | 8.48                 | 9.47      | 3.34   | 7.56                      |
| LC2                 | 8.21    | 1.40     | 8.44   | 4.36              | 5.07     | 8.38    | 8.28           | 8.21                 | 10.79     | 3.52   | 8.17                      |
| MCV1                | 7.83    | 2.73     | 8.53   | 5.95              | 5.91     | 10.06   | 9.18           | 9.65                 | 11.78     | 3.43   | 9.28                      |
| MCV2                | 7.74    | 1.33     | 9.15   | 4.56              | 5.22     | 8.00    | 8.57           | 9.07                 | 12.02     | 3.34   | 9.03                      |
| RVL3                | 6.82    | 1.55     | 9.68   | 4.55              | 4.69     | 4.36    | 7.08           | 7.41                 | 9.99      | 3.16   | 9.67                      |
| RVL4                | 7.81    | 1.71     | 8.97   | 4.14              | 6.09     | 7.90    | 8.70           | 9.46                 | 9.69      | 3.46   | 8.03                      |
| RVL6                | 6.84    | 1.85     | 8.64   | 5.66              | 4.61     | 5.85    | 7.19           | 8.14                 | 10.21     | 3.35   | 7.69                      |
| RVL7                | 6.75    | 1.62     | 7.84   | 5.93              | 5.25     | 5.78    | 6.38           | 9.30                 | 10.44     | 3.45   | 7.98                      |
| RVL10               | 7.15    | 1.81     | 7.92   | 5.60              | 4.73     | 3.60    | 6.60           | 7.58                 | 9.31      | 3.43   | 7.80                      |
| RVL11               | 6.82    | 2.14     | 9.15   | 4.50              | 5.34     | 5.25    | 8.25           | 7.64                 | 10.82     | 3.17   | 8.30                      |
| RVL12               | 7.56    | 2.39     | 7.99   | 5.63              | 5.38     | 6.35    | 6.15           | 8.94                 | 10.31     | 3.55   | 7.91                      |
| RVL13               | 6.71    | 2.40     | 8.55   | 4.83              | 5.26     | 3.62    | 6.12           | 7.56                 | 9.70      | 3.34   | 8.03                      |
| RVL14               | 7.24    | 1.87     | 8.38   | 4.55              | 5.42     | 5.09    | 7.40           | 8.51                 | 9.19      | 3.35   | 8.61                      |
| WBY1                | 8.81    | 1.29     | 9.19   | 5.10              | 5.10     | 9.68    | 8.10           | 9.43                 | 11.84     | 3.44   | 8.42                      |
| WBY2                | 8.04    | 2.15     | 8.49   | 4.78              | 5.61     | 8.80    | 9.15           | 9.33                 | 11.89     | 3.53   | 7.71                      |
| P value             | 0.014   | <0.001   | 0.037  | <0.001            | 0.045    | <0.001  | <0.001         | <0.001               | <0.001    | <0.001 | <0.001                    |

| Sample <sup>b</sup> | Malic Acid | Glucose/ Fructose | Volatile acidity | Density | Ethanol (%) |
|---------------------|------------|-------------------|------------------|---------|-------------|
| BV1                 | 0.50       | 0.23              | 0.25             | 0.992   | 13.39       |
| BV2                 | 0.33       | 0.20              | 0.28             | 0.992   | 13.43       |
| CV1                 | 0.33       | 1.10              | 0.26             | 0.991   | 13.66       |
| CV2                 | 0.47       | 1.27              | 0.26             | 0.991   | 13.95       |
| CWA1                | 0.50       | 1.37              | 0.28             | 0.990   | 14.04       |
| CWA2                | 0.37       | 1.03              | 0.28             | 0.991   | 13.58       |
| CWA3                | 0.33       | 0.90              | 0.25             | 0.991   | 13.46       |
| CWA5                | 0.53       | 0.97              | 0.28             | 0.992   | 12.32       |
| EV1                 | 0.67       | 0.47              | 0.19             | 0.992   | 14.72       |
| EV2                 | 0.47       | 0.63              | 0.27             | 0.991   | 14.32       |
| LC1                 | 0.43       | 1.03              | 0.26             | 0.991   | 12.97       |
| LC2                 | 0.50       | 1.00              | 0.25             | 0.992   | 13.27       |
| MCV1                | 0.60       | 1.27              | 0.33             | 0.993   | 14.50       |
| MCV2                | 0.50       | 1.50              | 0.41             | 0.991   | 14.86       |
| RVL3                | 0.30       | 0.73              | 0.37             | 0.992   | 13.81       |
| RVL4                | 0.33       | 1.33              | 0.25             | 0.990   | 14.42       |
| RVL6                | 0.33       | 0.97              | 0.28             | 0.992   | 13.56       |
| RVL7                | 0.70       | 1.17              | 0.31             | 0.992   | 14.18       |
| RVL10               | 0.23       | 1.03              | 0.30             | 0.991   | 13.66       |
| RVL11               | 0.40       | 0.70              | 0.31             | 0.991   | 13.81       |
| RVL12               | 0.53       | 1.30              | 0.37             | 0.991   | 14.95       |
| RVL13               | 0.47       | 0.90              | 0.26             | 0.991   | 13.62       |
| RVL14               | 0.23       | 1.10              | 0.24             | 0.990   | 14.48       |
| WBY1                | 0.57       | 0.80              | 0.23             | 0.990   | 14.69       |
| WBY2                | 0.53       | 1.47              | 0.36             | 0.990   | 14.60       |

<sup>a</sup>A: aroma; F: flavor; T: taste; MF: mouthfeel; AF: aftertaste.

<sup>b</sup>BV1, BV2: Barossa Valley (two parcels); CV1, CV2: Clare Valley (two parcels); CWA1, CWA2, CWA3, CWA5, CWA6: Coonawarra (four parcels; in vintage 2015, CWA4 was replaced by CWA6 because the former was unavailable); EV1, EV2: Eden Valley (two parcels); McV1, McV2: McLaren Vale (two parcels); LC1, LC2: Langhorne Creek (two parcels); RVL3, RVL4, RVL6, RVL7, RVL10, RVL11, RVL12, RVL13, RVL14: Riverland (nine parcels); and WBY1, WBY2: Wrattenbully (two parcels).

**Supplemental Data for:**

Niimi J, Boss PK, Jeffery D and Bastian SEP. 2017.

Linking sensory properties and chemical composition of *Vitis vinifera* cv. Cabernet Sauvignon grape berries to wine.

Am J Enol Vitic 68:357-368. doi: 10.5344/ajev.2017.16115.

**Supplemental Table 5** Chemical variables of the 25 Cabernet Sauvignon grape samples from eight regions across South Australia were analyzed with one-way ANOVA and were significantly different ( $p < 0.001$ ) across samples for all measurements.<sup>a</sup>

| Sample <sup>b</sup> | C_Hue  | C_Depth of color | A_Overall aroma | A_Dark fruit | A_Jam | A_Tobacco/leather | A_Alcohol | A_Savory | A_Green | A_Pepper | A_Earthy |
|---------------------|--------|------------------|-----------------|--------------|-------|-------------------|-----------|----------|---------|----------|----------|
| BV1                 | 9.4    | 7.5              | 9.4             | 6.5          | 2.6   | 2.8               | 6.0       | 2.8      | 5.4     | 3.8      | 2.4      |
| BV2                 | 9.0    | 7.4              | 9.4             | 6.3          | 2.2   | 2.8               | 5.9       | 3.1      | 5.7     | 4.0      | 2.6      |
| CV1                 | 9.8    | 10.6             | 8.7             | 7.1          | 2.8   | 2.8               | 6.6       | 2.9      | 3.3     | 4.2      | 2.5      |
| CV2                 | 10.9   | 10.6             | 8.8             | 7.6          | 3.0   | 2.7               | 6.3       | 2.7      | 3.6     | 4.8      | 2.1      |
| CWA2                | 12.9   | 10.1             | 8.4             | 7.5          | 2.8   | 2.4               | 5.9       | 2.2      | 3.2     | 4.3      | 2.2      |
| CWA3                | 12.2   | 8.2              | 8.2             | 6.9          | 2.9   | 2.3               | 5.9       | 2.3      | 3.3     | 3.9      | 2.1      |
| CWA5                | 12.4   | 6.5              | 8.0             | 6.2          | 2.2   | 2.0               | 5.5       | 2.3      | 3.6     | 3.9      | 2.2      |
| CWA6                | 12.5   | 9.1              | 8.6             | 7.1          | 2.7   | 2.7               | 6.1       | 2.6      | 4.2     | 4.4      | 2.1      |
| EV1                 | 10.9   | 6.5              | 8.4             | 5.8          | 2.2   | 2.8               | 5.9       | 3.0      | 4.7     | 4.1      | 2.3      |
| EV2                 | 10.8   | 5.0              | 9.0             | 5.3          | 1.9   | 2.3               | 5.6       | 2.9      | 7.5     | 4.0      | 2.3      |
| LC1                 | 12.5   | 8.1              | 8.6             | 7.2          | 2.9   | 2.6               | 6.0       | 2.5      | 4.0     | 3.7      | 2.5      |
| LC2                 | 12.3   | 6.2              | 8.2             | 6.6          | 2.3   | 2.5               | 5.6       | 2.5      | 3.9     | 3.7      | 2.1      |
| McV1                | 12.6   | 11.6             | 8.8             | 8.0          | 2.8   | 2.8               | 6.2       | 2.7      | 4.0     | 4.4      | 2.2      |
| McV2                | 11.4   | 8.9              | 9.2             | 8.1          | 3.5   | 2.7               | 6.0       | 2.7      | 2.9     | 4.1      | 2.4      |
| RVL3                | 11.2   | 6.5              | 8.2             | 7.1          | 2.5   | 2.3               | 5.9       | 2.4      | 3.2     | 4.1      | 2.1      |
| RVL4                | 8.9    | 6.1              | 8.9             | 7.2          | 3.1   | 2.9               | 5.2       | 2.9      | 2.9     | 3.4      | 3.1      |
| RVL6                | 10.3   | 3.9              | 7.9             | 6.1          | 2.3   | 2.6               | 5.7       | 2.4      | 2.9     | 3.6      | 2.1      |
| RVL7                | 11.9   | 8.0              | 9.2             | 8.0          | 2.8   | 2.6               | 6.0       | 2.4      | 3.7     | 4.0      | 2.1      |
| RVL10               | 8.9    | 3.5              | 7.5             | 6.3          | 2.4   | 2.0               | 5.9       | 2.1      | 3.5     | 4.1      | 2.0      |
| RVL11               | 7.8    | 3.7              | 8.3             | 6.7          | 3.2   | 2.2               | 5.2       | 2.2      | 2.6     | 3.6      | 2.2      |
| RVL12               | 7.9    | 3.9              | 9.0             | 6.2          | 3.1   | 2.4               | 5.8       | 3.2      | 3.7     | 3.5      | 2.4      |
| RVL13               | 8.8    | 4.7              | 7.7             | 6.4          | 2.8   | 2.5               | 5.6       | 2.5      | 3.6     | 4.2      | 2.1      |
| RVL14               | 8.9    | 7.3              | 9.0             | 7.3          | 3.2   | 2.6               | 6.3       | 3.0      | 3.8     | 4.4      | 2.2      |
| WBY1                | 12.0   | 10.2             | 8.7             | 7.9          | 2.9   | 2.6               | 6.0       | 2.6      | 4.2     | 4.3      | 2.4      |
| WBY2                | 11.1   | 7.1              | 8.4             | 6.7          | 2.7   | 2.7               | 5.8       | 2.7      | 3.6     | 4.4      | 2.3      |
| P value             | <0.001 | <0.001           | <0.001          | <0.001       | 0.005 | 0.033             | 0.021     | 0.016    | <0.001  | 0.012    | 0.017    |

| Sample <sup>b</sup> | F_Overall flavor | F_Dark fruit | F_Red fruit | F_Jam | F_Green | F_Pepper | T_Acid | T_Fruit sweetness | MF_Body | MF_Astringency | MF_Alcohol intensity |
|---------------------|------------------|--------------|-------------|-------|---------|----------|--------|-------------------|---------|----------------|----------------------|
| BV1                 | 8.9              | 7.2          | 3.7         | 3.0   | 4.1     | 3.7      | 6.2    | 5.3               | 6.8     | 7.4            | 7.7                  |
| BV2                 | 9.2              | 7.8          | 3.5         | 3.1   | 4.1     | 4.1      | 6.3    | 5.2               | 7.1     | 7.4            | 7.7                  |
| CV1                 | 9.5              | 8.8          | 3.1         | 3.4   | 2.4     | 4.4      | 6.6    | 4.8               | 8.3     | 8.5            | 8.8                  |
| CV2                 | 9.5              | 8.9          | 3.2         | 3.3   | 2.8     | 4.7      | 6.7    | 5.3               | 8.1     | 8.8            | 8.4                  |
| CWA2                | 8.9              | 8.5          | 2.8         | 2.9   | 2.6     | 4.1      | 6.5    | 4.2               | 7.5     | 8.8            | 7.6                  |
| CWA3                | 8.8              | 7.8          | 2.7         | 2.9   | 2.6     | 3.9      | 6.5    | 4.5               | 7.2     | 8.1            | 7.6                  |
| CWA5                | 8.2              | 6.6          | 3.2         | 2.1   | 2.5     | 3.4      | 7.2    | 3.6               | 6.3     | 8.7            | 6.8                  |
| CWA6                | 9.4              | 8.1          | 3.1         | 2.7   | 2.7     | 3.9      | 6.6    | 4.5               | 7.8     | 8.7            | 7.7                  |
| EV1                 | 9.3              | 7.4          | 3.1         | 2.7   | 3.5     | 3.8      | 6.9    | 4.4               | 7.1     | 8.8            | 7.5                  |
| EV2                 | 8.9              | 6.8          | 2.8         | 2.2   | 5.8     | 4.0      | 6.8    | 3.3               | 6.7     | 8.1            | 6.8                  |
| LC1                 | 9.1              | 7.7          | 3.5         | 3.0   | 2.6     | 3.6      | 6.6    | 4.3               | 7.1     | 8.1            | 7.4                  |
| LC2                 | 8.3              | 7.2          | 3.0         | 2.5   | 2.9     | 3.7      | 6.3    | 4.2               | 6.9     | 7.7            | 6.9                  |
| McV1                | 9.8              | 9.2          | 2.9         | 3.3   | 3.1     | 4.9      | 6.4    | 4.8               | 8.4     | 8.5            | 8.2                  |
| McV2                | 10.0             | 9.2          | 3.3         | 3.3   | 2.5     | 4.4      | 6.7    | 4.8               | 7.9     | 8.5            | 8.4                  |
| RVL3                | 8.9              | 7.9          | 3.4         | 2.8   | 2.4     | 3.7      | 6.8    | 4.5               | 7.2     | 8.0            | 7.3                  |
| RVL4                | 9.2              | 8.0          | 3.3         | 3.1   | 2.6     | 3.7      | 6.4    | 4.3               | 7.4     | 8.0            | 7.3                  |
| RVL6                | 8.8              | 7.4          | 3.8         | 2.8   | 2.5     | 3.6      | 6.6    | 4.9               | 6.7     | 7.4            | 7.0                  |
| RVL7                | 9.4              | 8.6          | 3.2         | 3.2   | 2.6     | 4.0      | 6.4    | 5.1               | 7.9     | 7.9            | 7.9                  |
| RVL10               | 8.2              | 6.7          | 3.3         | 2.8   | 2.4     | 3.6      | 6.3    | 3.8               | 6.0     | 7.5            | 7.2                  |
| RVL11               | 8.2              | 6.8          | 3.8         | 3.2   | 2.1     | 2.9      | 5.4    | 4.6               | 6.2     | 6.7            | 6.3                  |
| RVL12               | 8.8              | 6.7          | 4.0         | 3.2   | 2.7     | 3.6      | 5.8    | 5.2               | 6.7     | 7.0            | 7.4                  |
| RVL13               | 8.3              | 6.7          | 3.6         | 3.1   | 2.5     | 3.8      | 5.9    | 4.9               | 6.4     | 7.3            | 7.5                  |
| RVL14               | 9.3              | 8.6          | 3.0         | 3.3   | 2.9     | 4.7      | 6.5    | 4.8               | 7.5     | 7.5            | 7.7                  |
| WBY1                | 9.8              | 9.1          | 3.0         | 3.1   | 3.1     | 4.3      | 6.5    | 4.5               | 7.9     | 8.0            | 7.8                  |
| WBY2                | 8.6              | 7.9          | 3.1         | 2.6   | 2.5     | 3.9      | 6.6    | 4.2               | 6.9     | 8.1            | 7.7                  |
| P value             | <0.001           | <0.001       | 0.041       | 0.020 | <0.001  | <0.001   | <0.001 | <0.001            | <0.001  | <0.001         | <0.001               |



**Supplemental Data for:**

Niimi J, Boss PK, Jeffery D and Bastian SEP. 2017.

Linking sensory properties and chemical composition of *Vitis vinifera* cv. Cabernet Sauvignon grape berries to wine.

Am J Enol Vitic 68:357-368. doi: 10.5344/ajev.2017.16115.

**Supplemental Table 5 (continued)** Chemical variables of the 25 Cabernet Sauvignon grape samples from eight regions across South Australia were analyzed with one-way ANOVA and were significantly different ( $p < 0.001$ ) across samples for all measurements.<sup>a</sup>

| Sample <sup>b</sup> | F_Overall flavor | F_Dark fruit | F_Red fruit | F_Jam | F_Green | F_Pepper | T_Acid | T_Fruit sweetness | MF_Body | MF_Astringency | MF_Alcohol intensity |
|---------------------|------------------|--------------|-------------|-------|---------|----------|--------|-------------------|---------|----------------|----------------------|
| BV1                 | 8.9              | 7.2          | 3.7         | 3.0   | 4.1     | 3.7      | 6.2    | 5.3               | 6.8     | 7.4            | 7.7                  |
| BV2                 | 9.2              | 7.8          | 3.5         | 3.1   | 4.1     | 4.1      | 6.3    | 5.2               | 7.1     | 7.4            | 7.7                  |
| CV1                 | 9.5              | 8.8          | 3.1         | 3.4   | 2.4     | 4.4      | 6.6    | 4.8               | 8.3     | 8.5            | 8.8                  |
| CV2                 | 9.5              | 8.9          | 3.2         | 3.3   | 2.8     | 4.7      | 6.7    | 5.3               | 8.1     | 8.8            | 8.4                  |
| CWA2                | 8.9              | 8.5          | 2.8         | 2.9   | 2.6     | 4.1      | 6.5    | 4.2               | 7.5     | 8.8            | 7.6                  |
| CWA3                | 8.8              | 7.8          | 2.7         | 2.9   | 2.6     | 3.9      | 6.5    | 4.5               | 7.2     | 8.1            | 7.6                  |
| CWA5                | 8.2              | 6.6          | 3.2         | 2.1   | 2.5     | 3.4      | 7.2    | 3.6               | 6.3     | 8.7            | 6.8                  |
| CWA6                | 9.4              | 8.1          | 3.1         | 2.7   | 2.7     | 3.9      | 6.6    | 4.5               | 7.8     | 8.7            | 7.7                  |
| EV1                 | 9.3              | 7.4          | 3.1         | 2.7   | 3.5     | 3.8      | 6.9    | 4.4               | 7.1     | 8.8            | 7.5                  |
| EV2                 | 8.9              | 6.8          | 2.8         | 2.2   | 5.8     | 4.0      | 6.8    | 3.3               | 6.7     | 8.1            | 6.8                  |
| LC1                 | 9.1              | 7.7          | 3.5         | 3.0   | 2.6     | 3.6      | 6.6    | 4.3               | 7.1     | 8.1            | 7.4                  |
| LC2                 | 8.3              | 7.2          | 3.0         | 2.5   | 2.9     | 3.7      | 6.3    | 4.2               | 6.9     | 7.7            | 6.9                  |
| McV1                | 9.8              | 9.2          | 2.9         | 3.3   | 3.1     | 4.9      | 6.4    | 4.8               | 8.4     | 8.5            | 8.2                  |
| McV2                | 10.0             | 9.2          | 3.3         | 3.3   | 2.5     | 4.4      | 6.7    | 4.8               | 7.9     | 8.5            | 8.4                  |
| RVL3                | 8.9              | 7.9          | 3.4         | 2.8   | 2.4     | 3.7      | 6.8    | 4.5               | 7.2     | 8.0            | 7.3                  |
| RVL4                | 9.2              | 8.0          | 3.3         | 3.1   | 2.6     | 3.7      | 6.4    | 4.3               | 7.4     | 8.0            | 7.3                  |
| RVL6                | 8.8              | 7.4          | 3.8         | 2.8   | 2.5     | 3.6      | 6.6    | 4.9               | 6.7     | 7.4            | 7.0                  |
| RVL7                | 9.4              | 8.6          | 3.2         | 3.2   | 2.6     | 4.0      | 6.4    | 5.1               | 7.9     | 7.9            | 7.9                  |
| RVL10               | 8.2              | 6.7          | 3.3         | 2.8   | 2.4     | 3.6      | 6.3    | 3.8               | 6.0     | 7.5            | 7.2                  |
| RVL11               | 8.2              | 6.8          | 3.8         | 3.2   | 2.1     | 2.9      | 5.4    | 4.6               | 6.2     | 6.7            | 6.3                  |
| RVL12               | 8.8              | 6.7          | 4.0         | 3.2   | 2.7     | 3.6      | 5.8    | 5.2               | 6.7     | 7.0            | 7.4                  |
| RVL13               | 8.3              | 6.7          | 3.6         | 3.1   | 2.5     | 3.8      | 5.9    | 4.9               | 6.4     | 7.3            | 7.5                  |
| RVL14               | 9.3              | 8.6          | 3.0         | 3.3   | 2.9     | 4.7      | 6.5    | 4.8               | 7.5     | 7.5            | 7.7                  |
| WBY1                | 9.8              | 9.1          | 3.0         | 3.1   | 3.1     | 4.3      | 6.5    | 4.5               | 7.9     | 8.0            | 7.8                  |
| WBY2                | 8.6              | 7.9          | 3.1         | 2.6   | 2.5     | 3.9      | 6.6    | 4.2               | 6.9     | 8.1            | 7.7                  |
| P value             | <0.001           | <0.001       | 0.041       | 0.020 | <0.001  | <0.001   | <0.001 | <0.001            | <0.001  | <0.001         | <0.001               |

| Sample <sup>b</sup> | MF_Length | pH     | Titrateable acidity (g/L) | Malic acid | Glucose/ Fructose | Volatile acidity | Density | Ethanol (%) |
|---------------------|-----------|--------|---------------------------|------------|-------------------|------------------|---------|-------------|
| BV1                 | 10.0      | 4.01   | 4.28                      | 0.60       | 0.50              | 0.16             | 0.990   | 14.5        |
| BV2                 | 11.0      | 3.87   | 5.31                      | 0.50       | 0.70              | 0.19             | 0.990   | 15.3        |
| CV1                 | 11.8      | 3.57   | 7.17                      | 1.50       | 1.37              | 0.19             | 0.990   | 16.9        |
| CV2                 | 11.0      | 3.82   | 5.28                      | 0.60       | 1.37              | 0.14             | 0.990   | 16.9        |
| CWA2                | 11.0      | 3.69   | 5.43                      | 0.53       | 1.63              | 0.30             | 0.990   | 14.7        |
| CWA3                | 10.2      | 3.66   | 5.57                      | 0.57       | 1.27              | 0.17             | 0.987   | 15.5        |
| CWA5                | 9.2       | 3.41   | 5.49                      | 0.30       | 1.20              | 0.21             | 0.990   | 14.1        |
| CWA6                | 11.1      | 3.64   | 5.41                      | 0.43       | 0.97              | 0.17             | 0.990   | 15.1        |
| EV1                 | 10.5      | 3.54   | 6.18                      | 0.43       | 0.77              | 0.17             | 0.990   | 14.7        |
| EV2                 | 9.5       | 3.54   | 5.84                      | 0.30       | 0.73              | 0.27             | 0.990   | 13.5        |
| LC1                 | 10.7      | 3.60   | 6.56                      | 0.57       | 1.57              | 0.20             | 0.990   | 14.8        |
| LC2                 | 9.8       | 3.58   | 6.42                      | 0.40       | 1.40              | 0.27             | 0.990   | 14.1        |
| McV1                | 11.6      | 3.82   | 6.52                      | 0.73       | 1.97              | 0.20             | 0.990   | 16.4        |
| McV2                | 10.1      | 3.75   | 6.32                      | 0.73       | 1.87              | 0.24             | 0.990   | 16.2        |
| RVL3                | 10.0      | 3.51   | 6.91                      | 0.50       | 0.93              | 0.24             | 0.990   | 14.6        |
| RVL4                | 10.3      | 3.94   | 6.05                      | 0.73       | 1.60              | 0.27             | 0.990   | 14.4        |
| RVL6                | 10.3      | 3.42   | 6.58                      | 0.43       | 0.53              | 0.21             | 0.990   | 14.1        |
| RVL7                | 11.3      | 3.76   | 5.75                      | 0.60       | 1.30              | 0.18             | 0.990   | 15.0        |
| RVL10               | 9.3       | 3.51   | 6.36                      | 0.20       | 0.57              | 0.25             | 0.990   | 13.5        |
| RVL11               | 9.1       | 4.11   | 4.61                      | 0.80       | 0.77              | 0.20             | 0.990   | 13.3        |
| RVL12               | 9.9       | 4.14   | 4.59                      | 0.73       | 0.70              | 0.23             | 0.990   | 14.2        |
| RVL13               | 10.2      | 4.09   | 4.86                      | 0.83       | 0.90              | 0.18             | 0.990   | 15.7        |
| RVL14               | 10.2      | 4.20   | 4.97                      | 0.97       | 0.93              | 0.18             | 0.990   | 16.0        |
| WBY1                | 11.4      | 3.68   | 6.11                      | 0.53       | 1.03              | 0.19             | 0.990   | 15.7        |
| WBY2                | 10.5      | 3.81   | 6.03                      | 0.53       | 1.37              | 0.24             | 0.990   | 15.1        |
| P value             | 0.001     | <0.001 | <0.001                    | <0.001     | <0.001            | <0.001           | <0.001  | <0.001      |

<sup>a</sup>C: color; A: aroma; F: flavor; T: taste; MF: mouthfeel.

<sup>b</sup>BV1, BV2: Barossa Valley (two parcels); CV1, CV2: Clare Valley (two parcels); CWA1, CWA2, CWA3, CWA5, CWA6: Coonawarra (four parcels; in vintage 2015, CWA4 was replaced by CWA6 because the former was unavailable); EV1, EV2: Eden Valley (two parcels); McV1, McV2: McLaren Vale (two parcels); LC1, LC2: Langhorne Creek (two parcels); RVL3, RVL4, RVL6, RVL7, RVL10, RVL11, RVL12, RVL13, RVL14: Riverland (nine parcels); and WBY1, WBY2: Wrattonbully (two parcels).

**Supplemental Data for:**

Niimi J, Boss PK, Jeffery D and Bastian SEP. 2017.

Linking sensory properties and chemical composition of *Vitis vinifera* cv. Cabernet Sauvignon grape berries to wine.

Am J Enol Vitic 68:357-368. doi: 10.5344/ajev.2017.16115.

**Supplemental Table 6** Growing degree days calculated for Cabernet Sauvignon grape samples from eight regions across South Australia for two vintages (2014 and 2015).

| Growing degree day summation for 2014 vintage                |          |          |          |          |          |          |          |        |
|--------------------------------------------------------------|----------|----------|----------|----------|----------|----------|----------|--------|
| Region <sup>a</sup>                                          | Oct 2013 | Nov 2013 | Dec 2013 | Jan 2014 | Feb 2014 | Mar 2014 | Apr 2014 | TOTAL  |
| BV + EV                                                      | 138.0    | 207.0    | 309.0    | 413.9    | 331.8    | 277.5    | 162.0    | 1839.1 |
| CV                                                           | 127.1    | 207.0    | 315.0    | 434.0    | 343.0    | 291.4    | 168.0    | 1885.5 |
| LC                                                           | 164.3    | 195.0    | 289.5    | 387.5    | 302.4    | 285.2    | 205.5    | 1829.4 |
| McV                                                          | 196.9    | 243.0    | 333.0    | 435.6    | 354.2    | 327.1    | 237.0    | 2126.7 |
| RVL                                                          | 223.2    | 261.0    | 394.5    | 502.2    | 410.2    | 356.5    | 217.5    | 2365.1 |
| CWA + WBY                                                    | 99.2     | 129.0    | 223.5    | 347.2    | 281.4    | 232.5    | 154.5    | 1467.3 |
| Growing degree day summation for 2015 vintage                |          |          |          |          |          |          |          |        |
| Region <sup>a</sup>                                          | Oct 2014 | Nov 2014 | Dec 2014 | Jan 2015 | Feb 2015 | Mar 2015 | Apr 2015 | TOTAL  |
| BV + EV                                                      | 213.9    | 262.5    | 274.5    | 334.8    | 380.8    | 234.1    | 108.0    | 1808.6 |
| CV                                                           | 220.1    | 274.5    | 286.5    | 342.6    | 386.4    | 252.7    | 103.5    | 1866.2 |
| LC                                                           | 238.7    | 262.5    | 271.5    | 331.7    | 301.0    | 333.3    | 214.5    | 1953.2 |
| McV                                                          | 266.6    | 297.0    | 301.5    | 365.8    | 345.8    | 387.5    | 231.0    | 2195.2 |
| RVL                                                          | 317.8    | 345.0    | 432.0    | 469.7    | 424.2    | 392.2    | 306.0    | 2686.8 |
| CWA + WBY                                                    | 164.3    | 195.0    | 231.0    | 296.1    | 278.6    | 274.4    | 133.5    | 1572.8 |
| Growing degree day difference between 2014 and 2015 vintages |          |          |          |          |          |          |          |        |
| Region <sup>a</sup>                                          | Oct      | Nov      | Dec      | Jan      | Feb      | Mar      | Apr      | TOTAL  |
| BV + EV                                                      | 76.0     | 55.5     | -34.5    | -79.1    | 49.0     | -43.4    | -54.0    | -30.5  |
| CV                                                           | 93.0     | 67.5     | -28.5    | -91.5    | 43.4     | -38.8    | -64.5    | -19.3  |
| LC                                                           | 74.4     | 67.5     | -18.0    | -55.8    | -1.4     | 48.1     | 9.0      | 123.8  |
| McV                                                          | 69.8     | 54.0     | -31.5    | -69.8    | -8.4     | 60.5     | -6.0     | 68.6   |
| RVL                                                          | 94.6     | 84.0     | 37.5     | -32.5    | 14.0     | 35.7     | 88.5     | 321.7  |
| CWA + WBY                                                    | 65.1     | 66.0     | 7.5      | -51.2    | -2.8     | 41.9     | -21.0    | 105.5  |

<sup>a</sup>BV: Barossa Valley; CV: Clare Valley; CWA: Coonawarra; EV: Eden Valley; McV: McLaren Vale; LC: Langhorne Creek; RVL: Riverland; and WBY: Wrattenbully.
